# Supplementary material for: Comorbidity of Type 2 Diabetes and Dementia Among Hospitalized Patients in Los Angeles County, 2019-2021
Source: Preprints.org preprint supplement (doi:10.20944/preprints202310.0859.v1), 2023-10-13
Supplement: Supplementary file 1 [file supplementary]

**Supplementary Table 1.** ICD-10-CM and ICD-10-PCS Codes Used

| **Diagnoses of Interest** | **Corresponding ICD-10 code(s)** |
| --- | --- |
| *Diabetes* | |
| Type 2 diabetes mellitus | E11.X, E11.1X, E11.2X, E11.3X, E11.4X, E11.5X, E11.6X, E11.8, E11.9 |
| *Dementia* | |
| Vascular dementia | F01.5X, F01.AX, F01.BX, F01.CX |
| Dementia in other diseases classified elsewhere | F02.8X, F02.AX, F02.BX, F02.CX |
| Unspecified dementia | F03.9X, F03.AX, F03.BX, F03.CX |
| Huntington’s Disease | G10 |
| Parkinson’s Disease | G20 |
| Other secondary parkinsonism | G21.8 |
| Alzheimer’s Disease | G30.X |
| Frontotemporal dementia | G31.0 |
| Pick’s Disease | G31.01 |
| Other frontotemporal neurocognitive disorder | G31.09 |
| Senile degeneration of the brain not elsewhere classified | G31.1 |
| Neurocognitive disorder with Lewy bodies | G31.83 |
| *Diabetic Complications* | |
| Type 2 diabetes mellitus with ophthalmic complications | E11.3X |
| Type 2 diabetes mellitus with kidney complications | E11.2X |
| Type 2 diabetes mellitus with neurological complications | E11.4X |
| Hypertensive diseases | I10, I11.9, I11.0, I12.9, I12.0, I13.0, I13.2, I13.10, I13.11 |
| Low-extremity amputations among people with Type 2 diabetes mellitus | 0Y620ZZ, 0Y630ZZ, 0Y640ZZ, 0Y670ZZ, 0Y680ZZ, 0Y6C0Z1, 0Y6C0Z2, 0Y6C0Z3, 0Y6D0Z1, 0Y6D0Z2, 0Y6D0Z3, 0Y6F0ZZ, 0Y6G0ZZ, 0Y6H0Z1, 0Y6H0Z2, 0Y6H0Z3, 0Y6J0Z1, 0Y6J0Z2, 0Y6J0Z3, 0Y6M0Z0, 0Y6M0Z4, 0Y6M0Z5, 0Y6M0Z6, 0Y6M0Z7, 0Y6M0Z8, 0Y6M0Z9, 0Y6M0ZB, 0Y6M0ZC, 0Y6M0ZD, 0Y6M0ZF, 0Y6N0Z0, 0Y6N0Z4, 0Y6N0Z5, 0Y6N0Z6, 0Y6N0Z7, 0Y6N0Z8, 0Y6N0Z9, 0Y6N0ZB, 0Y6N0ZC, 0Y6N0ZD, 0Y6N0ZF |
| *Coronavirus Disease 2019* | |
| COVID-19 | U07.1 |

Key: ICD-10-CM = International Classification of Disease, Tenth Revision, Clinical Modification; ICD-10-PCS = International Classification of Disease, Tenth Revision, Procedure Coding System
